# Supplementary material for: Bloch-type magnetic skyrmions in two-dimensional lattices
Source: Royal Society of Chemistry journal article supplement (doi:10.1039/d3mh00868a), 2023-01-01
Supplement: d3mh00868a1.pdf [file d3mh00868a1.pdf]

## Supporting Information

### **Bloch-type magnetic skyrmions in two-dimensional lattice**

Wenhui Du, Kaiying Dou, Zhonglin He, Ying Dai\*, Baibiao Huang, Yandong Ma\*

School of Physics, State Key Laboratory of Crystal Materials, Shandong University, Shandan  
Street 27, Jinan 250100, China

\*Corresponding author: [daiy60@sina.com](mailto:daiy60@sina.com) (Y.D.); [yandong.ma@sdu.edu.cn](mailto:yandong.ma@sdu.edu.cn) (Y.M.)

**Note 1 :** Calculation details of magnetic parameters in spin Hamiltonian

The magnetic parameters are obtained from DFT calculations. The DMI vector  $D_{ij}$  for the nearest-neighbor Mn atoms can be expressed as  $D_{ij} = d_{\parallel} u_{ij} + d_{\perp} z$  with  $u_{ij}$  representing the unit vector pointing from site  $i$  to  $j$  and  $z$  being the out-of-plane unit vector. To obtain the in-plane component  $d_{\parallel}$ , the left- and right-hand spin-spiral configurations are considered, as shown in **Fig. 2(a)**. The energy of two spin configurations represented by  $E_L$  and  $E_R$  can be written as:

$$E_L = E_0 - \frac{3}{2} d_{\parallel} |S|^2 \times 4$$

$$E_R = E_0 + \frac{3}{2} d_{\parallel} |S|^2 \times 4$$

As a result, the in-plane component  $d_{\parallel}$  can be obtained by  $d_{\parallel} = \frac{E_R - E_L}{12}$ .

To obtain  $J$ ,  $\lambda$  and  $K_{MCA}$ , we consider four different spin configurations as displayed in **Fig. S4**. The energy of these different spin configurations can be written as:

$$E_1 = E_0 - 6J|S|^2$$

$$E_2 = E_0 + 2J|S|^2$$

$$E_3 = E_0 - 6J|S|^2 - 6\lambda|S|^2 - 2K_{MCA}|S|^2$$

$$E_4 = E_0 + 2J|S|^2 + 2\lambda|S|^2 - 2K_{MCA}|S|^2$$

Here,  $E_1$ ,  $E_2$ ,  $E_3$  and  $E_4$  represents the energy of x-FM, x-AFM, z-FM, and z-AFM configurations, respectively. Based on the above formula, magnetic parameters  $J$ ,  $\lambda$  and  $K_{MCA}$  can be obtained.

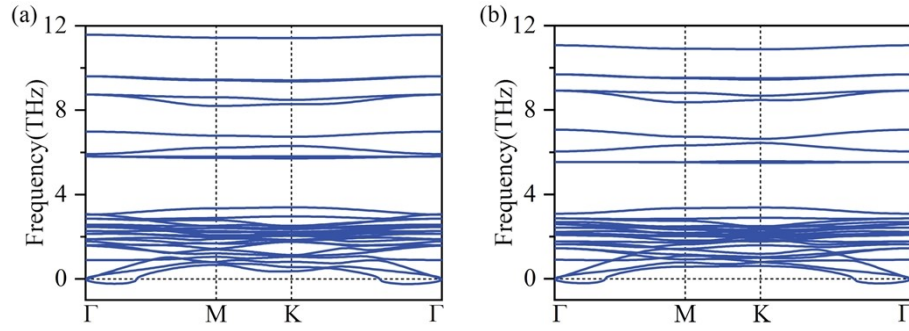

**Fig. S1.** Phonon spectra of monolayer (a)  $\text{MnInP}_2\text{Te}_6$  and (b)  $\text{MnTlP}_2\text{Te}_6$ . It can be seen that only a tiny negative frequency is observed around the  $\Gamma$  point, suggesting the dynamic stability of monolayer  $\text{MnXP}_2\text{Te}_6$ .

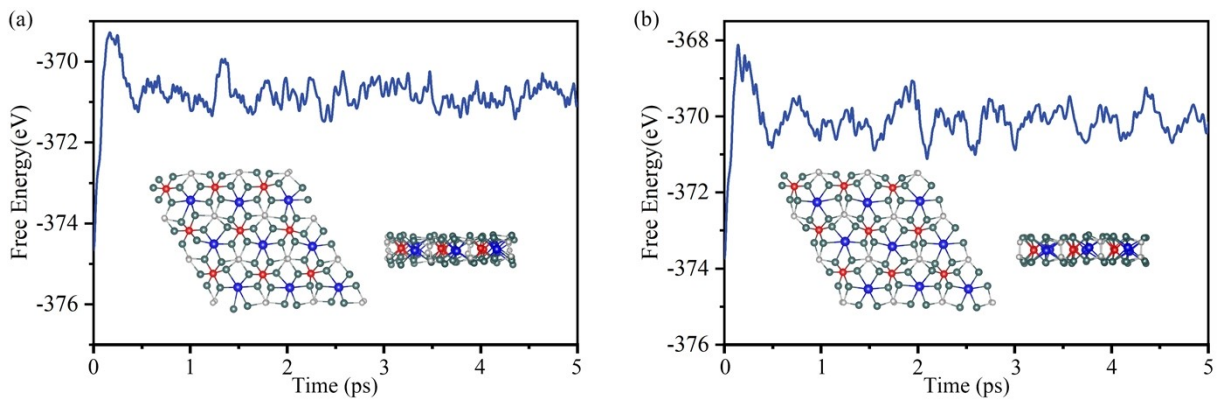

**Fig. S2.** Variations of total energies with time during the Ab initio molecular dynamics simulations for monolayer (a)  $\text{MnInP}_2\text{Te}_6$  and (b)  $\text{MnTlP}_2\text{Te}_6$  at 300 K and the corresponding snapshots taken from the end of the simulations. The slight free-energy fluctuations and well-defined structures indicate the thermal stability of monolayer  $\text{MnXP}_2\text{Te}_6$ .

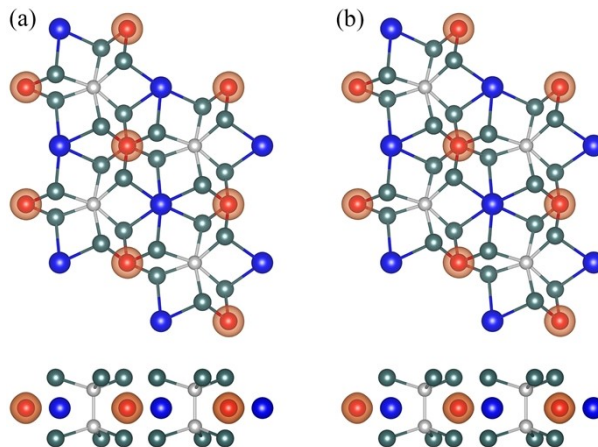

**Fig. S3.** Spin charge densities of monolayer (a)  $\text{MnInP}_2\text{Te}_6$  and (b)  $\text{MnTlP}_2\text{Te}_6$ .

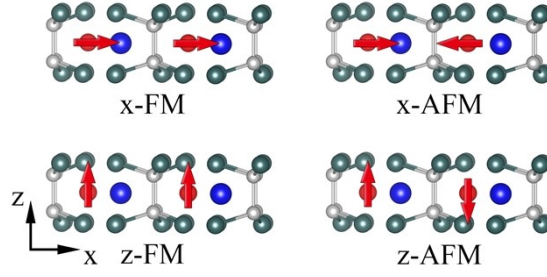

**Fig. S4.** Four different magnetic configurations used to obtain the magnetic parameters  $J$ ,  $\lambda$ , and  $K_{MCA}$  in monolayer  $\text{MnXP}_2\text{Te}_6$ .

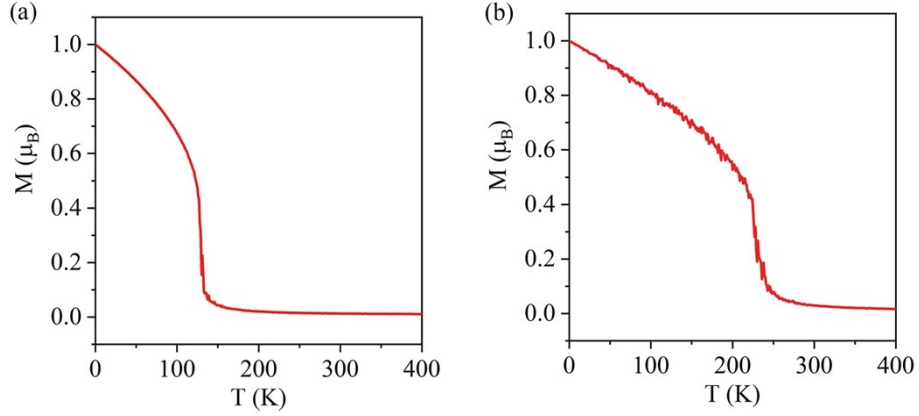

**Fig. S5.** Average magnetization ( $M$ ) per formula as a function of temperature ( $T$ ) of monolayer (a)  $\text{MnInP}_2\text{Te}_6$  and (b)  $\text{MnTlP}_2\text{Te}_6$  from Monte-Carlo simulations.

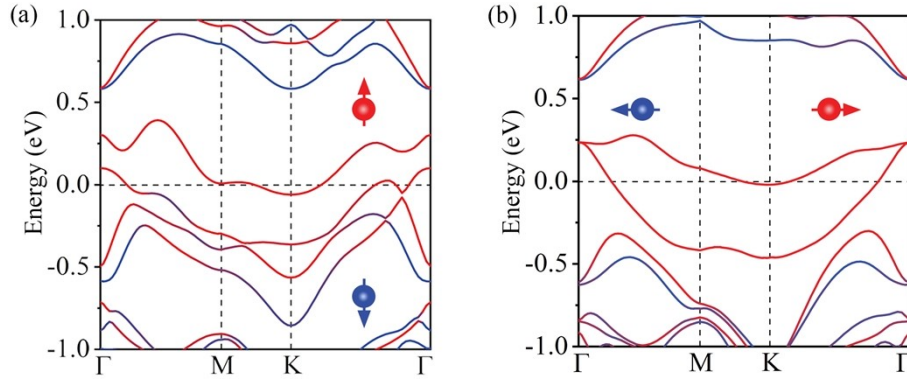

**Fig. S6.** Spin-polarized band structures of monolayer (a)  $\text{MnInP}_2\text{Te}_6$  and (b)  $\text{MnTlP}_2\text{Te}_6$  with SOC. The red and blue lines in (a, b) correspond to spin-up and spin-down states, respectively. The Fermi level is set to 0 eV.

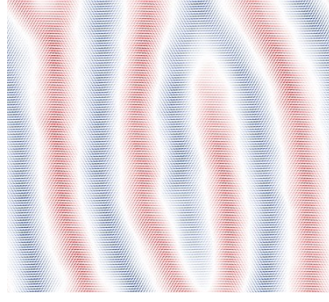

**Fig. S7.** Spin texture of monolayer  $\text{MnTIP}_2\text{Te}_6$  under in-plane magnetic field of 19 mT. It is superimposed by in-plane cycloidal structure and small out-of-plane wavy spin pattern.

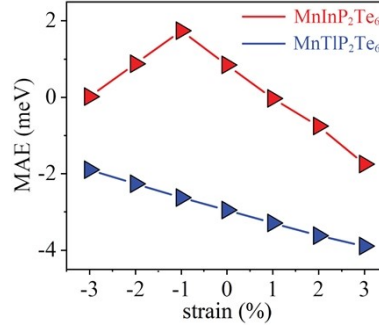

**Fig. S8.** Magnetic anisotropy energy (MAE) per unit cell of monolayer  $\text{MnXP}_2\text{Te}_6$  as a function of strain. MAE is defined as the energy difference between the systems with magnetization axis along in-plane ( $E_{in-plane}$ ) and out-of-plane ( $E_{out-of-plane}$ ) directions.

**Table S1.** Lattice constant  $a$  ( $\text{\AA}$ ), magnetic parameters [exchange coupling  $J$  (in meV), anisotropic symmetric exchange  $\lambda$  (in meV), magnetocrystalline anisotropy  $K_{MCA}$ (in meV), magnetic shape anisotropy  $K_{MSA}$ (in meV), single ion anisotropy  $K$  (in meV), in-plane DMI  $d_{\parallel}$  (in meV)] and magnetic moment  $m$  ( $\mu_B$ ) on Mn atom for monolayer  $\text{MnXP}_2\text{Te}_6$ .

|                             | $a$  | $J$    | $\lambda$ | $K_{MCA}$ | $K_{MSA}$ | $K$    | $d_{\parallel}$ | $m$   |
|-----------------------------|------|--------|-----------|-----------|-----------|--------|-----------------|-------|
| $\text{MnInP}_2\text{Te}_6$ | 7.13 | 10.108 | -0.048    | 1.015     | -0.026    | 0.989  | 2.873           | 4.191 |
| $\text{MnTIP}_2\text{Te}_6$ | 7.20 | 18.168 | -0.955    | -0.064    | -0.025    | -0.089 | 5.791           | 4.173 |

**Table S2.** Lattice constants  $a$  ( $\text{\AA}$ ), magnetic parameters [exchange coupling  $J$  (in meV), anisotropic symmetric exchange  $\lambda$  (in meV), magnetocrystalline anisotropy  $K_{MCA}$ (in meV), magnetic shape anisotropy  $K_{MSA}$ (in meV), single ion anisotropy  $K$  (in meV), in-plane DMI  $d_{\parallel}$  (in meV)] and

magnetic moments  $m$  ( $\mu_B$ ) on Mn atom for monolayer MnInP<sub>2</sub>Te<sub>6</sub> under various strains.

| MnInP <sub>2</sub> Te <sub>6</sub> | $a$  | $J$    | $\lambda$ | $K_{MCA}$ | $K_{MSA}$ | $K$    | $d_{\parallel}$ | $m$   |
|------------------------------------|------|--------|-----------|-----------|-----------|--------|-----------------|-------|
| -3%                                | 6.92 | 5.197  | 0.205     | -0.567    | -0.028    | -0.595 | 1.409           | 4.254 |
| -2%                                | 6.99 | 5.965  | 0.340     | -0.114    | -0.027    | -0.141 | 1.746           | 4.232 |
| -1%                                | 7.06 | 8.169  | 0.342     | 0.739     | -0.027    | 0.712  | 2.293           | 4.207 |
| 0%                                 | 7.13 | 10.108 | -0.048    | 1.015     | -0.026    | 0.989  | 2.873           | 4.191 |
| 1%                                 | 7.20 | 11.475 | -0.510    | 1.519     | -0.025    | 1.494  | 3.653           | 4.178 |
| 2%                                 | 7.27 | 12.622 | -0.946    | 2.109     | -0.024    | 2.085  | 4.600           | 4.175 |
| 3%                                 | 7.34 | 13.321 | -1.202    | 1.881     | -0.024    | 1.857  | 5.517           | 4.172 |

**Table S3.** Lattice constants  $a$  (Å), magnetic parameters [exchange coupling  $J$  (in meV), anisotropic symmetric exchange  $\lambda$  (in meV), magnetocrystalline anisotropy  $K_{MCA}$ (in meV), magnetic shape anisotropy  $K_{MSA}$ (in meV), single ion anisotropy  $K$  (in meV), in-plane DMI  $d_{\parallel}$  (in meV)] and magnetic moments  $m$  ( $\mu_B$ ) on Mn atom for monolayer MnTlP<sub>2</sub>Te<sub>6</sub> under various strains.

| MnTlP <sub>2</sub> Te <sub>6</sub> | $a$  | $J$    | $\lambda$ | $K_{MCA}$ | $K_{MSA}$ | $K$    | $d_{\parallel}$ | $m$   |
|------------------------------------|------|--------|-----------|-----------|-----------|--------|-----------------|-------|
| -3%                                | 6.99 | 19.700 | -0.485    | -0.416    | -0.027    | -0.443 | 4.095           | 4.184 |
| -2%                                | 7.06 | 19.600 | -0.688    | -0.178    | -0.027    | -0.205 | 4.753           | 4.177 |
| -1%                                | 7.13 | 19.111 | -0.850    | -0.053    | -0.026    | -0.079 | 5.362           | 4.172 |
| 0%                                 | 7.20 | 18.168 | -0.955    | -0.064    | -0.025    | -0.089 | 5.791           | 4.173 |
| 1%                                 | 7.27 | 17.056 | -1.050    | -0.114    | -0.024    | -0.138 | 6.035           | 4.174 |
| 2%                                 | 7.35 | 15.969 | -1.154    | -0.137    | -0.024    | -0.161 | 6.106           | 4.180 |
| 3%                                 | 7.42 | 14.909 | -1.248    | -0.126    | -0.023    | -0.149 | 6.088           | 4.189 |
